## Editorial Board

### EDITOR-IN-CHIEF

**Erin L. Dolan**  
University of Georgia  
eldolan@uga.edu

### SENIOR EDITORS

**Daron Barnard**  
Worcester State University  
daron.barnard@worcester.edu

**Cynthia Bauerle**  
James Madison University  
bauerlcm@jmu.edu

**Graham F. Hatfull**  
University of Pittsburgh  
gfh@pitt.edu

### EDITORS

**Joel K. Abraham**  
California State University, Fullerton  
jkabraham@fullerton.edu

**Bruce Alberts**  
University of California, San Francisco  
balberts@ucsf.edu

**Janet Batzli**  
University of Wisconsin-Madison  
jcbatzli@wisc.edu

**Cynthia Brame**  
Vanderbilt University  
cynthia.brame@vanderbilt.edu

**Peggy Brickman**  
University of Georgia  
brickman@uga.edu

**Clark Coffman**  
Iowa State University  
ccoffman@iastate.edu

**John Coley**  
Northeastern University  
j.coley@neu.edu

**Sarah L. Eddy**  
Florida International University  
seddy@fiu.edu

**David Feldon**  
Utah State University  
david.feldon@usu.edu

**Stephanie Gardner**  
Purdue University  
sgardne@purdue.edu

**Kenneth Gibbs**  
National Institute of  
General Medical Sciences  
kgibbsjr@gmail.com

**Julia Gouvea**  
Tufts  
Julia.Gouvea@tufts.edu

**James Hewlett**  
Finger Lakes Community College  
hewletja@flcc.edu

**Jennifer Knight**  
University of Colorado, Boulder  
jennifer.knight@colorado.edu

**Mary Lee Ledbetter**  
College of the Holy Cross  
mledbett@holycross.edu

**Jennifer Loertscher**  
Seattle University  
loertscher@seattleu.edu

**Gil Marbach-Ad**  
University of Maryland  
mack@aacu.org

**Emily Miller**  
Association of American Colleges  
and Universities  
emily.miller@aau.edu

**Jennifer Momsen**  
North Dakota State University  
Jennifer.Momsen@nds.edu

**Ross Nehm**  
Stony Brook University  
ross.nehm@stonybrook.edu

**Diane K. O'Dowd**  
University of California, Irvine  
dkodowd@uci.edu

**Kathryn E. Perez**  
University of Texas Rio Grande Valley  
kathryn.perez@utrgv.edu

**Rebecca Price**  
University of Washington Bothell  
beccap@uw.edu

**C. Gary Reiness**  
Lewis and Clark College  
reiness@lclark.edu

**Brian Sato**  
UC Irvine  
bsato@uci.edu

**Jeff Schinske**  
De Anza College  
schinskejeff@fhda.edu

**Elisabeth Schussler**  
University of Tennessee Knoxville  
eschuss@utk.edu

**James J. Smith**  
Michigan State University  
jimsmith@msu.edu

**Rebecca Smith**  
University of California, San Francisco  
rebecca.smith@ucsf.edu

**Rachelle Spell**  
Emory University  
rspell@emory.edu

**Marilyne Stains**  
University of Nebraska, Lincoln  
mstains2@unl.edu

**Marshall Sundberg**  
Emporia State University  
sundberm@esumail.emporia.edu

**Kimberly Tanner**  
San Francisco State University  
kdtanner@sfsu.edu

**Debra Tomanek**  
University of Arizona  
dtomanek@u.arizona.edu

**Carl Wieman**  
Stanford University  
cwieman@stanford.edu

**Kristy Jean Wilson**  
Marian University  
kjwilson@marian.edu

**Adele Wolfson**  
Wellesley College  
awolfson@wellesley.edu

### PUBLISHER

**Erika C. Shugart**  
ASCB Chief Executive Officer

**W. Mark Leader**  
ASCB Publications Director

**Thea Clarke**  
ASCB Director of Communications  
and Education

**Eric T. Baker**  
ASCB Journals Manager

Published by

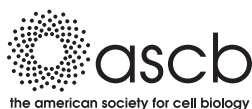

Editorial Partner

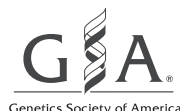

CBE—Life Sciences Education (ISSN 1931-7913) is published online quarterly (one volume per year) by The American Society for Cell Biology, 8120 Woodmont Avenue, Suite 750, Bethesda, MD 20814-2762, USA; www.ascb.org. The journal, which is accessible at www.lifescied.org and www.pubmedcentral.nih.gov, is supported in part by a grant from the Howard Hughes Medical Institute. "ASCB," "The American Society for Cell Biology," "iBioSeminars," and "Molecular Biology of the Cell" are registered trademarks of The American Society for Cell Biology. "The Cell: An Image Library" is a common law trademark of The American Society for Cell Biology.

Owned and published by The American Society for Cell Biology, Erika C. Shugart, *Chief Executive Officer*
